# Supplementary material
Source: PubMed Central journal article supplement (PMC5814322)

**Supplemental Figure 1. Kaplan-Meier curve for overall survival by age at diagnosis (left & middle); Kaplan-Meier curve for overall survival by metastasis at diagnosis (right), all for combined analysis of European and Brazilian populations.**

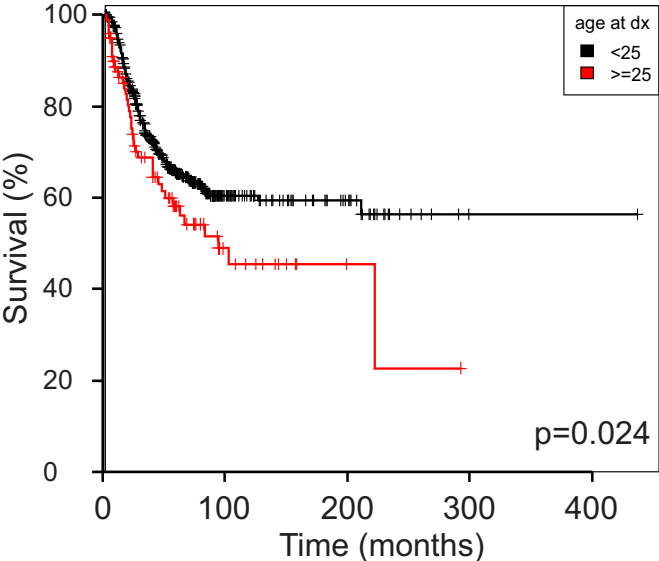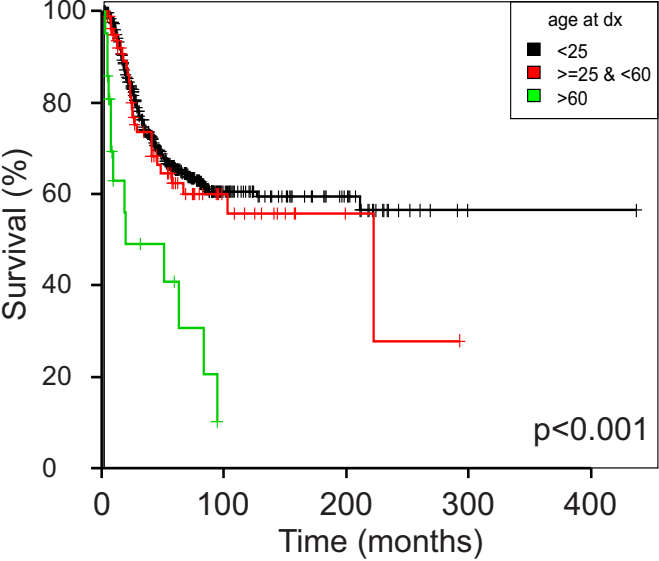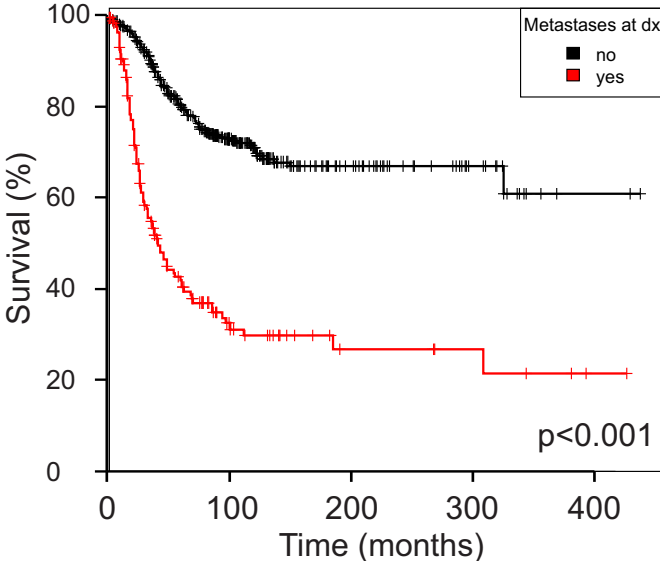

**Supplemental Figure 2. QQ plot (left) and Manhattan plot (right) for association with overall survival in the European set. The strongest SNP after the meta-analysis of the European and Brazilian sets is shown in green.**

**QQ plot for overall survival**

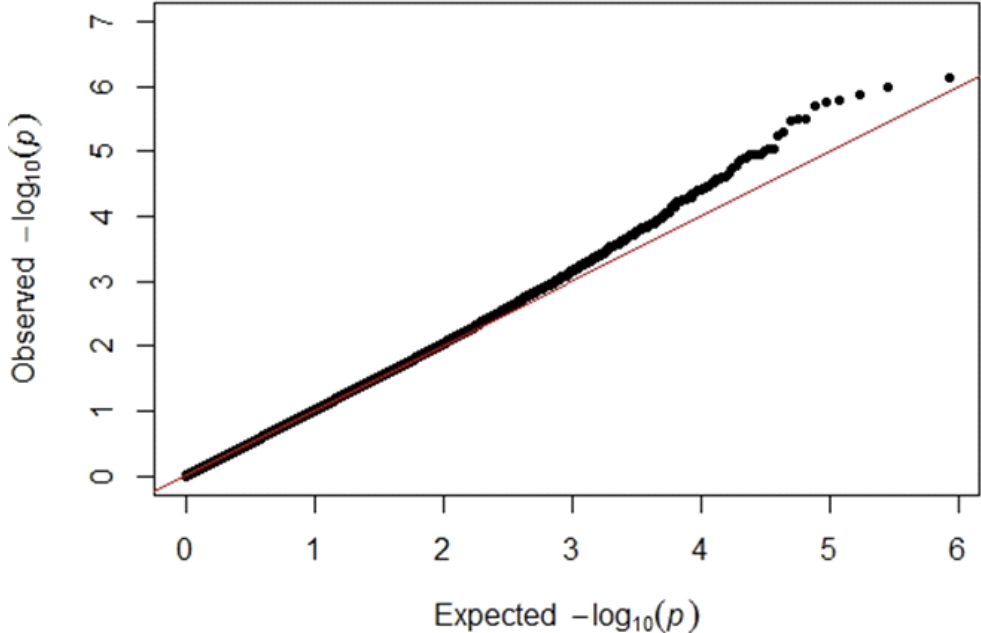

**Manhattan plot for overall survival**

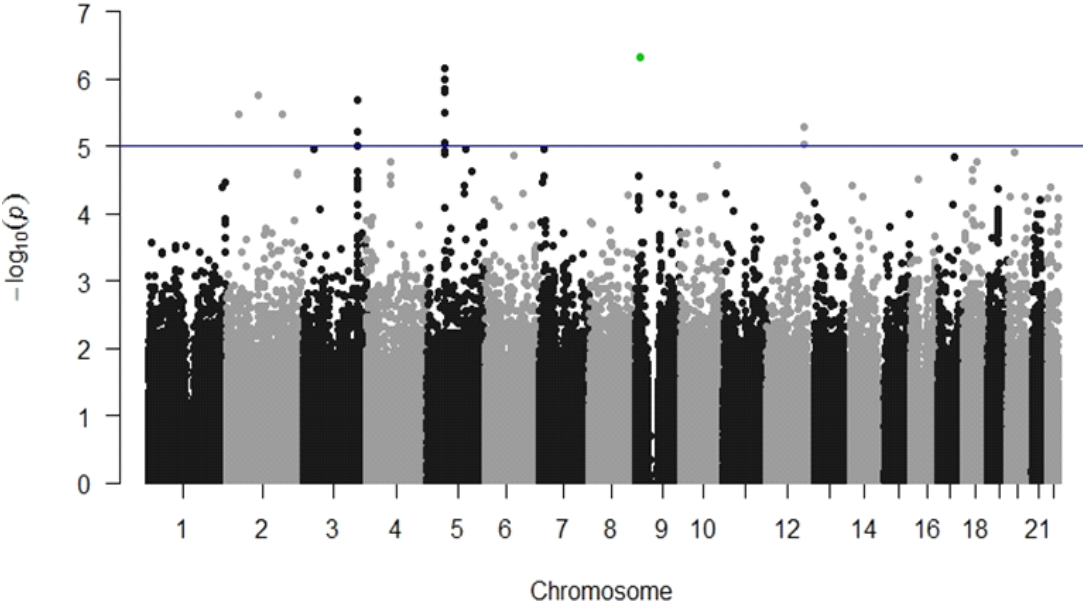

Supplemental Figure 3. eQTL plot for rs55933544 and *IL33* expression (left) and Kaplan-Meier curve (right) for survival per *IL33* expression.

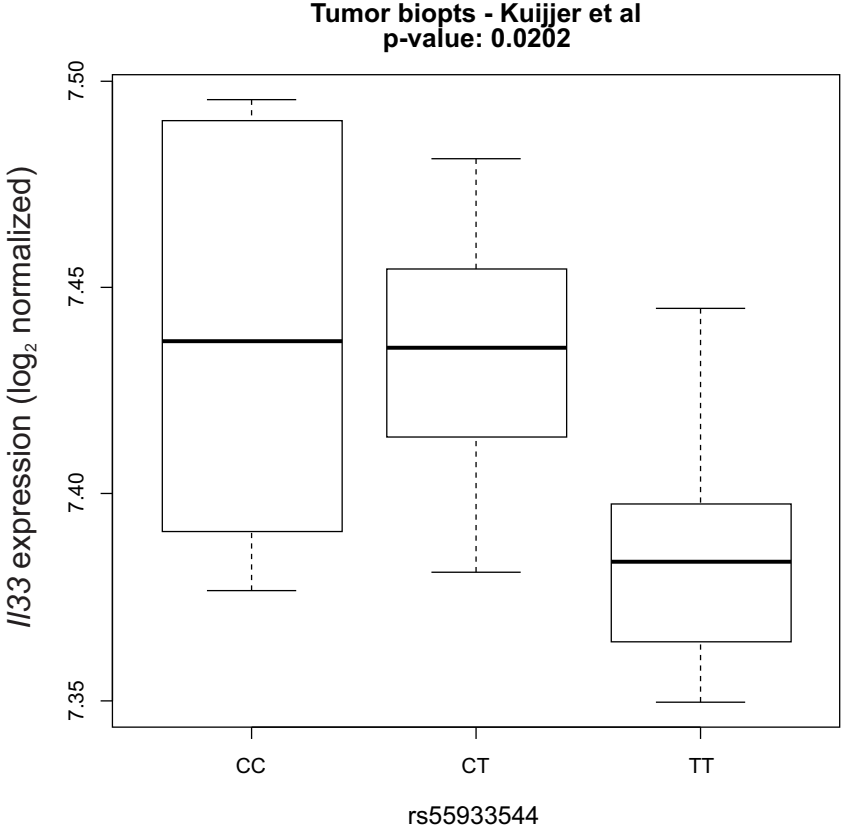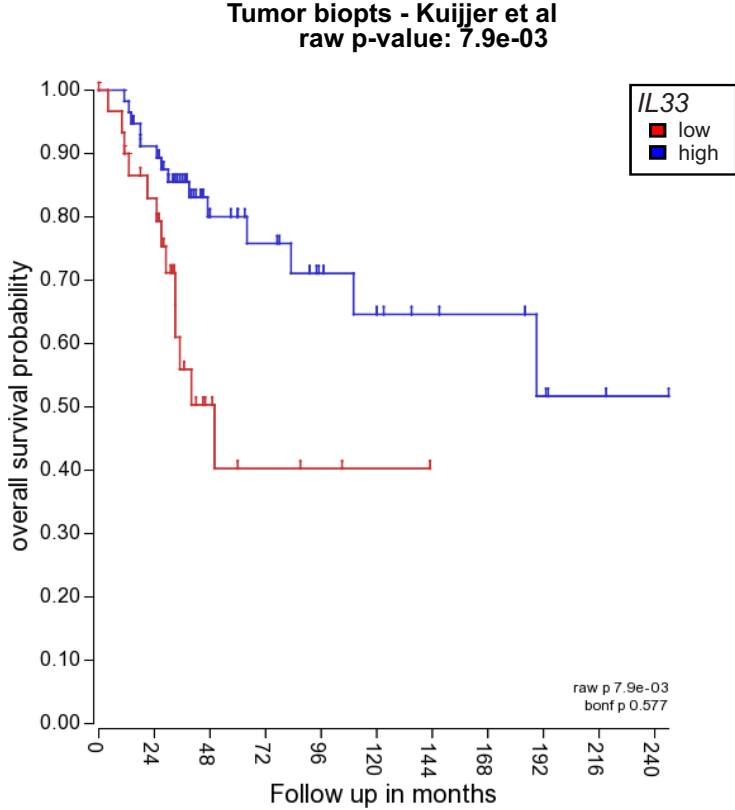

Supplement: NIHMS925151-supplement-Supp_figures.pdf [file NIHMS925151-supplement-Supp_figures.pdf]
